# Supplementary material for: Identifying a Common Functional Framework for Apathy Large-Scale Brain Network
Source: MDPI journal article supplement (doi:10.3390/jpm11070679), 2021-07-19
Supplement: s1 [file s1]

### Supplementary Materials:

**Table S1.** fMRI seed-to-seed total results from resting-state paradigm with functional connectivity between apathetic patients and HC groups (higher connectivity between seeds have a positive value of T-score, lower connectivity have a negative value of T-score).

| Apathetic patients > HC                          |                                 |         |       |
|--------------------------------------------------|---------------------------------|---------|-------|
| Seed                                             | Targets                         | T-score | p-FDR |
| Frontal Pole right                               | aSMG left                       | -4.3    | 0.013 |
|                                                  | aSMG right                      | -4      | 0.013 |
| Postcentral Gyrus left<br>central opercular left | aSMG left                       | 4.2     | 0.014 |
|                                                  | frontal operculum right         | 3.5     | 0.043 |
|                                                  | aParahippocampal gyrus<br>right | -4.2    | 0.007 |
|                                                  | Putamen left                    | 3.5     | 0.043 |
| Planum Polare left                               | aParahippocampal gyrus<br>right | -4.3    | 0.007 |
|                                                  | Planum temporale right          | -3.8    | 0.015 |
|                                                  | SMA right                       | -3.6    | 0.017 |
|                                                  | Temporal pole right             | -3.4    | 0.029 |
|                                                  | subcallosal cortex              | -3.1    | 0.046 |
|                                                  | Postcentral Gyrus left          | -3.1    | 0.046 |
|                                                  | inferior temporal gyrus right   | -3      | 0.048 |
|                                                  | caudate left                    | 3       | 0.048 |
|                                                  | Heschl's gyrus right            | -3.9    | 0.032 |
|                                                  | aSTG                            | -3.7    | 0.032 |

**Table S2.** fMRI seed-to-seed total results from resting-state paradigm with functional connectivity between apathetic FTD-PD and HC groups (higher connectivity between seeds have a positive value of T-score, lower connectivity have a negative value of T-score).

| Apathetic FTD > HC                |                             |         |       |
|-----------------------------------|-----------------------------|---------|-------|
| Seed                              | Targets                     | T-score | p-FDR |
| Insular cortex left               | caudate left                | 4.3     | 0.023 |
| Postcentral gyrus right           | frontal orbital cortex left | -3.8    | 0.041 |
|                                   | hippocampus left            | -3.6    | 0.047 |
| frontal orbital cortex left       | aSTG left                   | 3.9     | 0.042 |
| Planum Polare left                | Postcentral gyrus left      | -3.6    | 0.048 |
|                                   | caudate left                | 3.5     | 0.048 |
| Apathetic PD > HC                 |                             |         |       |
| Seed                              | Targets                     | T-score | p-FDR |
| Frontal Pole right                | aSMG left                   | -4      | 0.02  |
|                                   | aSMG right                  | -4      | 0.02  |
| Temporal pole right<br>pSTG right | parietal operculum left     | -4      | 0.04  |
|                                   | planum polare right         | -4.1    | 0.026 |
|                                   | central opercular right     | -3.9    | 0.026 |
| pMTG right                        | planum polare right         | -3.5    | 0.048 |
|                                   | planum temporale left       | -3.5    | 0.048 |
|                                   | parietal operculum left     | -3.4    | 0.048 |
| postcentral gyrus left            | aSMG left                   | 4.3     | 0.018 |
| aParahippocampal gyrus<br>right   | central opercular left      | -4.3    | 0.018 |
| lingual gyrus left                | accumbens left              | 4       | 0.039 |
| Planum Polare left                | planum temporale right      | -3.7    | 0.021 |

|                      |                                 |      |       |
|----------------------|---------------------------------|------|-------|
|                      | pMTG right                      | -4.1 | 0.016 |
|                      | Temporal pole right             | -3.6 | 0.021 |
|                      | aParahippocampal gyrus<br>right | -3.5 | 0.022 |
|                      | aSTG left                       | -3.3 | 0.04  |
|                      | SMA right                       | -3.2 | 0.045 |
|                      | pITG right                      | -3.1 | 0.045 |
|                      | hippocampus right               | -3.1 | 0.045 |
| Heschl's gyrus right | aSTG left                       | -3.7 | 0.041 |
| Heschl's gyrus left  | Heschl's gyrus right            | -4   | 0.034 |
|                      | pSTG right                      | -3.7 | 0.044 |
|                      | pMTG right                      | -3.3 | 0.046 |
|                      | planum temporale right          | -3.3 | 0.046 |
|                      | aSTG left                       | -3.3 | 0.046 |
|                      | SMA left                        | -3.3 | 0.046 |

---
